# Supplementary material
Source: PubMed Central journal article supplement (PMC6869028)
Supplement: HBM-35-3465-s001.pdf [file HBM-35-3465-s001.pdf]

# Supplementary Online Material

for

## **Translating working memory into action: Behavioural and neural evidence for using motor representations in encoding visuo-spatial sequences**

Robert Langner, Melanie A. Sternkopf, Tanja S. Kellermann,  
Christian Grefkes, Florian Kurth, Karl Zilles, & Simon B. Eickhoff

(e-mail: robert.langner@uni-duesseldorf.de)

### **Supplementary Results**

#### ***Effector-independent activity differences between encoding and recall***

We contrasted activity during encoding and recall to delineate areas selectively associated with either sub-process. These comparisons were based only on trials with correct reproduction and were performed across both hands and both delays. Higher activity during encoding compared to recall was found bilaterally in a cluster extending from rostral dPMC (superior frontal junction, presumably corresponding to human FEF) over rostral vPMC to IFJ and (predominantly right) posterior dorsal area 44 (Fig. S1, red-coloured voxels; Table S1). This cluster substantially overlapped with the dPMC and vPMC clusters reported above as being significantly activated during both encoding and recall (cf. Fig. 3). Encoding-specific activity was also observed in a bilateral (though left-dominant) cluster extending from pre-SMA to anterodorsal MCC (caudal area 32') as well as in a bilateral cluster covering major parts of the occipital (visual) cortex, extending dorsally to IPS (area HIP3) and SPL (areas 7A, 7PC), mid-laterally to posterior STS, and ventrally to fusiform and posterior inferior temporal gyrus. Subcortically, we found stronger encoding-related activity in bilateral medial thalamus, ventral striatum (anterior putamen and nucleus accumbens), and a cluster extending from postero-inferior pulvinar to hippocampal subiculum (area SUB).

Contrasting recall against encoding (see Fig. S1, blue-coloured voxels; Table S1) revealed bilaterally increased activity in SI/SII (predominantly areas 2, 3b, OP1, OP4) as well as adjacent SPL (areas 5L, 7A, 7PC) and TPJ (areas PFT, PFop, PF). This contrast further yielded increased activity in bilateral caudal dPMC [area 6; located posteriorly to (1) the dPMC cluster commonly activated by encoding and recall (cf. Fig. 3) and (2) the rostral dPMC cluster observed in the reverse contrast (cf. above)], in a bilateral cluster covering parts of SMA and midcingulate cortex [ventral MCC (areas a24' and p24'), located posteriorly to the pre-SMA/MCC cluster observed in the reverse contrast (cf. above)], as well as in a cluster comprising large parts of the central insula, extending medially via the claustrum to the mid-putamen and laterally to the IFG pars opercularis (area 44). Further recall-specific activity was observed in the cerebellar vermis and cerebellar lobulus VI bilaterally as well as in bilateral posterolateral putamen.

**Table S1**

***Differences in brain activity between encoding and recalling visuo-spatial sequences***

| <b>Location</b>                    | <b>Histological Assignment</b> | <b>Local Maximum</b> |     |     | <b>t-value</b> |
|------------------------------------|--------------------------------|----------------------|-----|-----|----------------|
| <b>Encoding vs. recall</b>         |                                |                      |     |     |                |
| <i>Left hemisphere</i>             |                                |                      |     |     |                |
| Inferior occipital gyrus           | hOC4v (V4)                     | -42                  | -80 | -12 | 23.4           |
| Inferior occipital gyrus           | hOC3v (V3v)                    | -30                  | -93 | -12 | 22.1           |
| Superior parietal lobule           | 7PC                            | -27                  | -54 | 50  | 15.4           |
| Inferior temporal gyrus            | -                              | -47                  | -56 | -15 | 14.4           |
| Intraparietal sulcus               | hIP3                           | -25                  | -57 | 49  | 14.4           |
| Dorsal premotor cortex             | area 6                         | -39                  | -6  | 47  | 12.5           |
| Superior parietal lobule           | 7A                             | -26                  | -60 | 53  | 12.4           |
| Pulvinar                           | -                              | -20                  | -29 | 0   | 9.0            |
| Superior parietal lobule           | 7P                             | -18                  | -78 | 50  | 8.7            |
| Ventral premotor cortex            | -                              | -38                  | 5   | 28  | 8.6            |
| Posterior superior temporal sulcus | -                              | -54                  | -47 | 8   | 7.9            |
| Hippocampus (Subiculum)            | SUB                            | -18                  | -28 | -8  | 7.6            |
| Putamen                            | -                              | -20                  | 16  | -10 | 7.6            |
| pre-SMA                            | area 6                         | -9                   | 0   | 60  | 7.1            |
| Inferior frontal gyrus             | area 44                        | -45                  | 6   | 30  | 6.7            |
| Nucleus accumbens                  | -                              | -11                  | 13  | -14 | 5.9            |
| Medial thalamus                    | -                              | -5                   | -5  | 0   | 5.0            |

### *Right hemisphere*

|                                    |             |    |     |     |      |
|------------------------------------|-------------|----|-----|-----|------|
| Middle occipital gyrus             | hOC3v (V3v) | 32 | -90 | 2   | 23.8 |
| Inferior occipital gyrus           | hOC4v (V4)  | 42 | -78 | -12 | 22.3 |
| Inferior temporal gyrus            | -           | 48 | -71 | -6  | 20.4 |
| Intraparietal sulcus               | hIP3        | 28 | -57 | 45  | 13.6 |
| Ventral premotor cortex            | -           | 40 | 6   | 32  | 11.1 |
| Posterior superior temporal sulcus | -           | 54 | -44 | 10  | 11.0 |
| Inferior frontal gyrus             | area 44     | 43 | 8   | 27  | 9.3  |
| Putamen                            | -           | 19 | 16  | -10 | 9.1  |
| Hippocampus (Subiculum)            | SUB         | 20 | -30 | -5  | 8.4  |
| Pulvinar                           | -           | 18 | -29 | 1   | 8.1  |
| Dorsal premotor cortex             | area 6      | 37 | -6  | 45  | 7.9  |
| Superior parietal lobule           | 7A          | 28 | -64 | 56  | 7.7  |
| Medial thalamus                    | -           | 6  | -8  | -1  | 7.4  |
| Superior parietal lobule           | 7PC         | 28 | -54 | 53  | 6.7  |
| Nucleus accumbens                  | -           | 12 | 9   | -9  | 6.6  |
| pre-SMA                            | area 6      | 8  | 8   | 51  | 6.1  |
| Caudate                            | -           | 6  | 12  | -9  | 5.5  |
| Cerebellum                         | vermis      | 2  | -53 | -38 | 5.3  |

### **Recall vs. encoding**

#### *Left hemisphere*

|                           |                  |     |     |     |      |
|---------------------------|------------------|-----|-----|-----|------|
| Central insula            | -                | -41 | 0   | 8   | 15.3 |
| SMA                       | area 6           | 0   | -12 | 51  | 11.2 |
| Parietal operculum        | OP1              | -62 | -20 | 20  | 10.6 |
| Midcingulate cortex       | areas a24', p24' | -3  | -2  | 42  | 9.9  |
| Postcentral sulcus        | area 2           | -53 | -26 | 44  | 9.7  |
| Temporo-parietal junction | PFop, PF, PFt    | -59 | -23 | 30  | 9.5  |
| Cerebellum                | lobule VI        | -23 | -60 | -23 | 8.0  |
| Superior parietal lobule  | 7A               | -27 | -50 | 69  | 7.9  |
| Superior parietal lobule  | 5L               | -25 | -48 | 66  | 7.7  |
| Dorsal premotor cortex    | area 6           | -24 | -18 | 68  | 7.0  |
| Putamen                   | -                | -30 | 0   | -2  | 6.8  |
| Inferior frontal gyrus    | area 44          | -60 | 6   | 10  | 5.5  |
| Cerebellum                | lobule VIII      | -20 | -65 | -47 | 5.1  |

#### *Right hemisphere*

|                           |                  |    |     |     |      |
|---------------------------|------------------|----|-----|-----|------|
| Central insula            | -                | 39 | 3   | 5   | 12.4 |
| Cerebellum                | vermis           | 2  | -63 | -17 | 10.1 |
| Parietal operculum        | OP1              | 62 | -24 | 27  | 8.3  |
| Midcingulate cortex       | areas a24', p24' | 6  | -2  | 39  | 8.2  |
| Temporo-parietal junction | PF, PFt, PFop,   | 61 | -25 | 29  | 8.0  |
| Cerebellum                | lobule VI        | 24 | -54 | -26 | 7.9  |
| Dorsal premotor cortex    | area 6           | 33 | -17 | 62  | 7.4  |
| Inferior frontal gyrus    | area 44          | 58 | 8   | 8   | 7.3  |
| Putamen                   | -                | 27 | -2  | -2  | 7.0  |
| Superior parietal lobule  | 7PC              | 29 | -51 | 63  | 6.8  |
| Superior parietal lobule  | 5L               | 22 | -54 | 66  | 6.7  |
| Pallidum                  | -                | 27 | -5  | -2  | 6.1  |
| Postcentral sulcus        | area 2           | 48 | -32 | 50  | 5.9  |
| Caudate                   | -                | 18 | -2  | 17  | 5.3  |
| SMA                       | area 6           | 8  | -14 | 69  | 5.0  |

Note (Table S1). Peak coordinates refer to MNI space. SMA = supplementary motor area; References to histological assignments: area 2: Grefkes et al. (2001); area 6: Geyer (2004); 7A, 7P, 7PC, 5L, HIP3: Scheperjans et al. (2008); areas a24', p24': Palomero-Gallagher et al. (2008); area 44: Amunts et al. (1999); hOC3(V3v), hOC4(V4v): Rottschy et al. (2007); OP1: Eickhoff et al. (2006); Pfp, Pft, PF, PGa: Caspers et al. (2006); SUB: Amunts et al. (2005); Cerebellum: Diedrichsen et al. (2009).

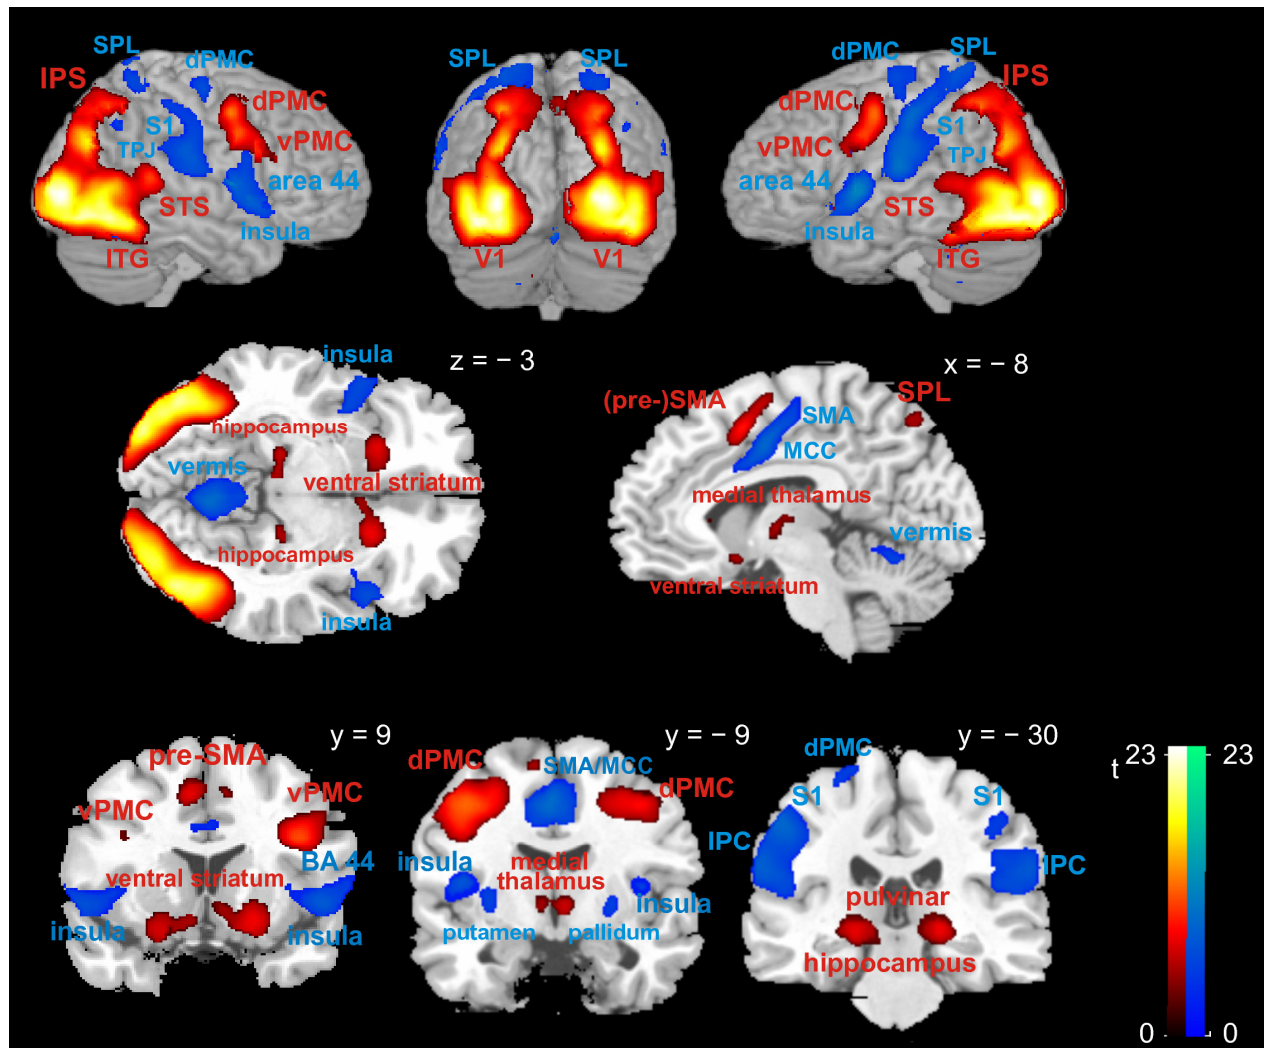

**Figure S1.** Differences in brain activity between encoding and correctly recalling visuo-spatial sequences, irrespective of delay length and effector side. Warm colours denote higher activity during encoding (vs. recalling) sequences; cool colours denote higher activity during recalling (vs. encoding) sequences. Section coordinates refer to MNI space.

Abbreviations: dPMC = dorsal premotor cortex; IPC = inferior parietal cortex; IPS = intraparietal sulcus; ITG = inferior temporal gyrus; MCC = midcingulate cortex; pre-SMA = pre-supplementary motor area; S1 = primary somatosensory cortex; SPL = superior parietal lobule; STS = superior temporal sulcus; TPJ = temporoparietal junction; vPMC = ventral premotor cortex.

## Supplementary Discussion

The basal ganglia featured regions more specifically activated by encoding (anterior putamen and nucleus accumbens) or recall (middle and posterior putamen). This differentiation is consistent with studies on motor sequence learning in humans (Jueptner et al. 1997; Lehericy et al. 2005; Toni et al. 1998) and animals (Miyachi et al. 2002) showing that anterior striatal activity is associated with early learning, and posterior striatal activity with overlearned responding. In our task, new sequences were presented on every trial, precluding across-trial learning. However, each encoding–reproduction cycle itself can be considered a miniature learning episode, in which encoding required a sequence to be memorised (i.e. “learned”), and recall required the memorandum (i.e. the “learned material”) to be applied for manual reproduction. The anterior ventral striatum is part of a “limbic” cortico–basal ganglia loop (Alexander et al. 1986) involving afferents from the hippocampus and efferents, via the mediodorsal thalamus, to the DLPFC and anterior midcingulate cortex (cf. Turner and Desmurget 2010); it is deemed responsible for boosting the selection of action-relevant visual items and their mapping onto specific motor behaviours. We here showed specifically encoding-related activity within this entire network, which also implicates hippocampal involvement in the encoding of visuo-spatial sequence information for short-term storage, as previously suggested by animal and patient studies (for a review, see Marshuetz 2005). In contrast, the middle and posterior putamen are part of the skeletomotor loop and might, in collaboration with the “motoric” central insula (Kurth et al. 2010), support the efficient encoding and subsequent overt expression of the (memorised) motor intention.

The dorso-caudal aspect of the dPMC also showed significantly higher activity during recall than encoding. This resonates well with current concepts that in particular the caudal aspects of the dPMC are involved in lower-level motor control and hence the actual execution of movements (reviewed in Abe and Hanakawa 2009; see also Chouinard and Paus 2006; Simon et al. 2002). For instance, dPMC was found to represent the spatial targets of planned reach movements in both gaze- and body-centred reference frames (Bernier and Grafton 2010; Beurze et al. 2010;

McGuire and Sabes 2009). Therefore, it may be argued that the more pronounced increase in caudal dPMC activity during recall reflects spatial information processing for the lower-level programming of motor output for sequence reproduction.

As argued before (cf. main discussion), the mid-DLPFC may contribute to the sequencing of actions via converting a chain of task-relevant input into temporally ordered behavioural goals (during encoding) and selecting the appropriate string of goal-relevant action representations (during recall). However, this high-level translation can only be achieved by disassembling the observed temporospatial input pattern into temporally distinct units forming the basis of subsequently executable motor operations. We suggest that this process is guided by the rule that defines the mapping of the location of a given red dot onto the flexion of a specific finger, represented by dPMC activity and fed to frontomedial areas for temporal segregation. During encoding of longer sequences, the segregated sensorimotor units probably need be reassembled immediately into a manageable number of chunks, a process that most likely relies on mid-DLPFC involvement. During recall, the individual elements (or chunks) have to be implemented in the remembered order. Based on previous evidence (e.g. Hoffstaedter et al. 2013) and our own data we suggest that this memory-guided (i.e. internally triggered) initiation of temporally distinct movements relies on the anterior MCC.

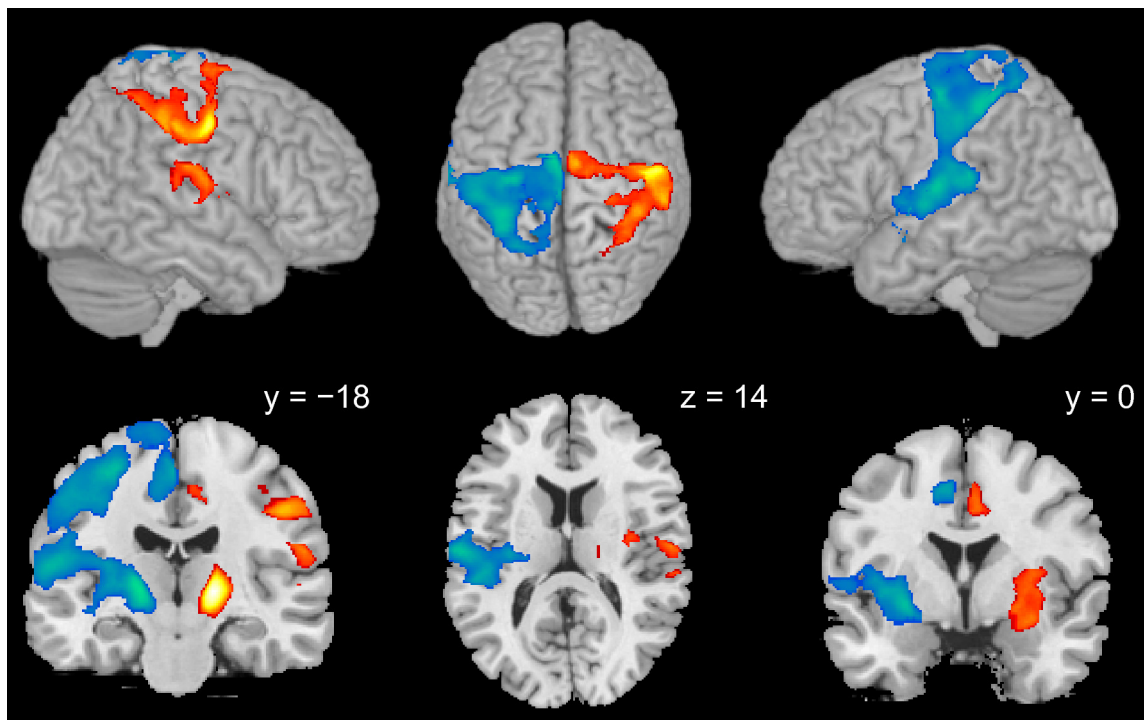

**Figure S2.** Effector-specific effects of delayed versus immediate recall. Warm colours denote higher activity during delayed, relative to immediate, recall of left-hand (vs. right-hand) sequences; cool colours denote higher activity during delayed, relative to immediate, recall of right-hand (vs. left-hand) sequences.

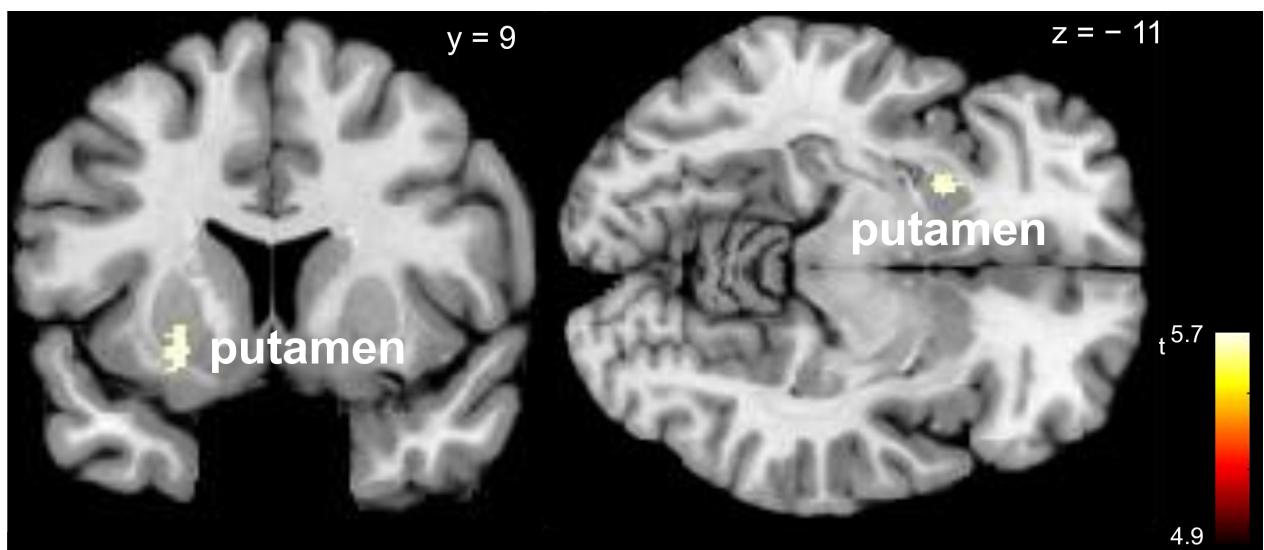

**Figure S3.** Encoding-related activity selectively associated with subsequent correct (vs. incorrect) recall, irrespective of delay length and effector side. Section coordinates refer to MNI space.

**Table S2**

***Effector-specific brain activity related to delayed (vs. immediate) recall***

| <b>Location</b>                       | <b>Histological Assignment</b> | <b>Local Maximum</b> |     |     | <b>t-value</b> |
|---------------------------------------|--------------------------------|----------------------|-----|-----|----------------|
| <b>Left- vs. right-hand sequences</b> |                                |                      |     |     |                |
| <i>Right hemisphere</i>               |                                |                      |     |     |                |
| Thalamus                              | -                              | 17                   | -20 | 2   | 7.9            |
| Primary motor cortex                  | areas 4a, 4p                   | 53                   | -12 | 42  | 6.9            |
| Pallidum                              | -                              | 23                   | -6  | 5   | 5.5            |
| Temporo-parietal junction             | PFt, PFop, PF                  | 57                   | -29 | 42  | 5.4            |
| SMA                                   | area 6                         | 8                    | -9  | 59  | 5.1            |
| Postcentral sulcus                    | area 2                         | 42                   | -36 | 45  | 5.0            |
| Dorsal premotor cortex                | area 6                         | 48                   | -11 | 51  | 4.6            |
| Putamen                               | -                              | 36                   | -5  | 0   | 4.5            |
| Superior parietal lobule              | 7PC                            | 35                   | -48 | 56  | 4.3            |
| Intraparietal sulcus                  | hip3                           | 36                   | -45 | 53  | 4.2            |
| Parietal operculum                    | OP3, OP4, OP1                  | 36                   | -9  | 14  | 3.9            |
| Central sulcus                        | area 3a                        | 23                   | -27 | 47  | 3.9            |
| Superior parietal lobule              | 7A                             | 26                   | -59 | 60  | 3.5            |
| Postcentral gyrus                     | areas 3b, 1                    | 41                   | -27 | 59  | 3.4            |
| <b>Right- vs. left-hand sequences</b> |                                |                      |     |     |                |
| <i>Left hemisphere</i>                |                                |                      |     |     |                |
| Thalamus                              | -                              | -17                  | -15 | -2  | 7.1            |
| SMA                                   | area 6                         | -5                   | -6  | 53  | 6.8            |
| Parietal operculum                    | OP4, OP1, OP2                  | -60                  | -15 | 12  | 6.2            |
| Postcentral sulcus                    | area 2                         | -33                  | -36 | -51 | 6.1            |
| Dorsal premotor cortex                | area 6                         | -29                  | -18 | 57  | 6.1            |
| Putamen                               | -                              | -27                  | 0   | -6  | 6.0            |
| Superior parietal lobule              | 7PC                            | -33                  | -45 | 59  | 5.9            |
| Temporo-parietal junction             | PFcm, PFt                      | -50                  | -32 | 18  | 5.9            |
| Primary motor cortex                  | areas 4a, 4p                   | -3                   | -26 | 54  | 5.5            |
| Central insula                        | -                              | -36                  | -11 | -8  | 5.2            |
| Superior parietal lobule              | 7A                             | -26                  | -54 | 63  | 5.0            |
| Postcentral gyrus                     | areas 3b, 1                    | -47                  | -20 | 45  | 5.0            |
| Central sulcus                        | area 3a                        | -39                  | -21 | 38  | 5.0            |
| Superior parietal lobule              | 5L                             | -17                  | -50 | 78  | 4.1            |
| Inferior frontal gyrus                | area 44                        | -62                  | 3   | 6   | 3.3            |

*Note.* Peak coordinates refer to MNI space. SMA = supplementary motor area;

References to histological assignments: areas 4a, 4p: Geyer et al. (1996); area 44: Amunts et al. (1999); areas 1, 3a, 3b: Geyer et al. (1999); area 2: Grefkes et al. (2001); area 6: Geyer (2004); PFop, PF, PFt, PFcm: Caspers et al. (2006); OP1-OP4: Eickhoff et al. (2006); 7A, 7PC, 5L: Scheperjans et al. (2008).



## References

- Abe M, Hanakawa T. 2009. Functional coupling underlying motor and cognitive functions of the dorsal premotor cortex. *Behav Brain Res.* 198:13-23.
- Alexander GE, DeLong MR, Strick PL. 1986. Parallel organization of functionally segregated circuits linking basal ganglia and cortex. *Annu Rev Neurosci.* 9:357-381.
- Amunts K, Kedo O, Kindler M, Pieperhoff P, Mohlberg H, Shah NJ, Habel U, Schneider F, Zilles K. 2005. Cytoarchitectonic mapping of the human amygdala, hippocampal region and entorhinal cortex: intersubject variability and probability maps. *Anat Embryol (Berl).* 210:343-352.
- Bernier PM, Grafton ST. 2010. Human posterior parietal cortex flexibly determines reference frames for reaching based on sensory context. *Neuron.* 68:776-788.
- Beurze SM, Toni I, Pisella L, Medendorp WP. 2010. Reference frames for reach planning in human parietofrontal cortex. *J Neurophysiol.* 104:1736-1745.
- Chouinard PA, Paus T. 2006. The primary motor and premotor areas of the human cerebral cortex. *Neuroscientist.* 12:143-152.
- Hoffstaedter F, Grefkes C, Zilles K, Eickhoff SB. 2013. The "what" and "when" of self-initiated movements. *Cereb Cortex.* 23:520-530.
- Jueptner M, Frith CD, Brooks DJ, Frackowiak RS, Passingham RE. 1997. Anatomy of motor learning. II. Subcortical structures and learning by trial and error. *J Neurophysiol.* 77:1325-1337.
- Kurth F, Zilles K, Fox PT, Laird AR, Eickhoff SB. 2010. A link between the systems: Functional differentiation and integration within the human insula revealed by meta-analysis. *Brain Struct Funct.* 214:519-534.
- Lehéricy S, Benali H, Van de Moortele PF, Péligrini-Issac M, Wächter T, Ugurbil K, Doyon J. 2005. Distinct basal ganglia territories are engaged in early and advanced motor sequence learning. *Proc Natl Acad Sci U S A.* 102:12566-12571.
- Marshuetz C. 2005. Order information in working memory: an integrative review of evidence from brain and behavior. *Psychol Bull.* 131:323-339.
- McGuire LM, Sabes PN. 2009. Sensory transformations and the use of multiple reference frames for reach planning. *Nat Neurosci.* 12:1056-1061.
- Miyachi S, Hikosaka O, Lu X. 2002. Differential activation of monkey striatal neurons in the early and late stages of procedural learning. *Exp Brain Res.* 146:122-126.
- Rottschy C, Eickhoff SB, Schleicher A, Mohlberg H, Kujovic M, Zilles K, Amunts K. 2007. Ventral visual cortex in humans: cytoarchitectonic mapping of two extrastriate areas. *Hum Brain Mapp.* 28:1045-1059.
- Simon SR, Meunier M, Pieltre L, Berardi AM, Segebarth CM, Boussaoud D. 2002. Spatial attention and memory versus motor preparation: Premotor cortex involvement as revealed by fMRI. *J Neurophysiol.* 88:2047-2057.
- Toni I, Krams M, Turner R, Passingham RE. 1998. The time course of changes during motor sequence learning: a whole-brain fMRI study. *Neuroimage.* 8:50-61
- Turner RS, Desmurget M. 2010. Basal ganglia contributions to motor control: a vigorous tutor. *Curr Opin Neurobiol.* 20:704-716.
